# Supplementary material
Source: ML conference proceedings conference paper supplement (https://openreview.net/forum?id=maSAKOKXTi)
Supplement: supplementary_material [file attachment]

---

# Supplementary Materials: Generative Evolutionary Strategy for Black-box Optimization

---

Anonymous Author(s)

Affiliation

Address

email

1 This appendix elaborates on the algorithm design details and additional experimental results of the  
2 Generative Evolutionary Strategy for Black-box Optimization, not covered in the main text.

## 3 A Model implementation details

### 4 A.1 Neural Network

5 In our research, the selection and design of the neural network type plays a fundamental role as our  
6 model is grounded on a surrogate neural network. For this particular study, we used a modification of  
7 the Transformer [49] (the multi-head self-attention network) model. This structure is suitable because  
8 it can adjust to experiments of different sizes without needing any changes. Another advantage is that  
9 it can avoid a spatial correlation problem among variables.

10 While it is true that Convolutional Neural Networks (CNNs) and Recurrent Neural Networks (RNNs)  
11 are beneficial when it comes to dimension expansion, they do come with their share of challenges,  
12 notably the spatial correlation problems. In contrast, a problem of attention-based neural network is  
13 computational complexity, which escalates to  $\mathcal{O}(d^2)$  when the variable size hits  $d$ . This often results  
14 in Graphics Processing Unit (GPU) memory shortages. Therefore, we had to look for other options.  
15 We could either choose a network like CNN, which has complexity  $\mathcal{O}(d)$ , or find a completely new  
16 solution.

17 To address this, we introduced a strategy we have termed the trunk-branch trick. While this method  
18 continues to employ the attention mechanism, it subtly modifies the structure to reduce complexity.  
19 First, we create a trunk network. Then, from the trunk, we attach  $M$  branch networks. Each of these  
20 branches predicts a segment of the total dimension  $d$  of the target variable, specifically  $d/M$ . The  
21 structures of the generator and critic are mirror images of each other, meaning they are symmetrical.  
22 For the generator, it starts processing in the trunk and then spreads out to the branches to create the  
23 target variable  $x$ . The critic works the other way around: its branches take parts of  $x$  and bring them  
24 back together in the trunk.

25 Implementing this method effectively brings down the complexity to  $\mathcal{O}(d^2/M)$ , offering a solution  
26 to GPU memory shortages. However, the trunk-branch affects the optimization performance of GEO.  
27 The related experiment is described in the Additional experiments chapter.

### 28 A.2 Non-dominated sorting

29 When dealing with scenarios that involve multiple target functions, there is often a competitive  
30 interaction between each function's optimal points. Imagine a variable  $x$  that increases the value of  
31 one function,  $f_1(x)$ , while it simultaneously reduces the value of another function,  $f_2(x)$ , and vice  
32 versa. In such situations, we use a method known as non-dominated sorting to identify the optimal  
33 point.

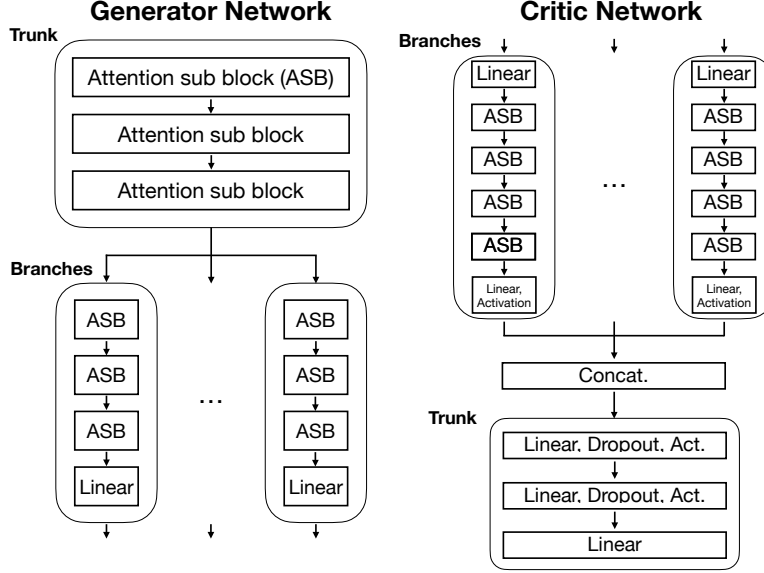

Figure 1: Generator and critic network structure.

Let's look at minimization problems to understand this better. We label a specific point,  $x_0$ , as non-dominated when we cannot find another point  $x$  that fulfills the condition  $f_i(x) < f_i(x_0)$  for all the target objective functions  $f_i$ . These non-dominated points form a group known as the first Pareto-front. Consequently, we can arrange these Pareto-fronts in an order, creating a sequence like the 1st Pareto-front, 2nd Pareto-front, and so on. This ordered arrangement is what we refer to as non-dominated sorting.

There are many different methods in non-dominated sorting, each with its own computational complexity. However, we did not place too much emphasis on this aspect, as our pool size was small enough that the time required for non-dominated sorting was considerably less than that required for neural network computations.

### A.3 Training details

In the Methods section of the main text, we noted the potential tendency of GEO towards the exploitation with regard to the exploit-explore strategy. This trait primarily emerges from its design, a combination of ES and GSN. Furthermore, this tendency could limit the algorithm's potential for exploration. Therefore, we added several strategies to boost its exploration abilities.

One approach we used was to try various learning rates. We prepared a wide range of learning rates, from small to large values, and applied them either randomly or all at once for each mutation event. This approach can provide an escape path if the algorithm gets stuck in a local optimum. We also considered implementing random mutations, changing the parameters of the sampled generator network or specific layers to create mutants. At the very least, these additional techniques do not compromise performance, although we could not definitively establish that they enhanced it.

We also tested various hyperparameters which directly impact experimental results. For example, the pool size is important because it plays a key role in shaping the Pareto-front.

For certain functions, such as the ZDT functions, it is necessary to set boundaries. The boundary construction method can affect performance. We can find the results of these experiments in the Additional experiments section.

For the training of the generator (mutation), we chose to train in the  $n$  separate directions using  $n$  independent critic networks. There can be another approach where we sum up  $n$  fitness scores and then increase the average score. However, this method could possibly lead to a bias towards points in the middle of the Pareto front. Moreover, this approach introduces new hyperparameters related

64 to the normalization of each fitness score, which significantly influences the algorithm’s behavior.  
65 Therefore, to circumvent the introduction of new hyperparameters, we chose to conduct the training  
66  $n$  times independently.

## 67 **B Experiment details**

### 68 **B.1 Non-convex test functions**

69 In our experiment, we analyzed multiple dimensions, each requiring comparative investigation. To  
70 make the analysis process consistent, we normalized all test functions in line with their dimension  
71 sizes. Most of test functions have the ground state as 0; however, the Styblinski-Tang function does  
72 not. Therefore, we recalibrated its value to set 0 as the ground state. Although all these functions  
73 fall under the non-convex category, the Rosenbrock function has distinct properties, as its optimal  
74 solution resides within a flat valley region

### 75 **B.2 Computational details**

76 We aimed to run the algorithm with minimal hardware acceleration. Therefore, we designed the  
77 algorithm to be compatible with a single GPU. When we faced memory shortages, we employed  
78 the trunk-branch trick, a method we previously discussed in the neural networks chapter. By using  
79 the NVIDIA Tesla v100 32GB GPU, it took about three days to execute 100,000 function calls and  
80 trainings. The majority of this computational time was dedicated to training the neural networks.

81 We could enhance the efficiency of neural networks by incorporating a CNN or optimizing the  
82 attention model. However, given the scope of our task, which involved 100,000 function calls across  
83 8192 dimensions, the model we currently have is sufficient. Thus, we did not devote substantial  
84 time to network optimization. Moreover, we have to avoid excessively refining the algorithm for a  
85 specific test function. Such over-tuning could lead to overfitting and consequently limit the model’s  
86 performance on different problems especially for real-world problems.

87 In our study, we made 100,000 function calls for each task. Although this might seem like a  
88 considerable number, it is not particularly large when viewed within the context of machine learning  
89 and neural networks. Therefore, we found a smaller model that could run on a single GPU to be the  
90 most suitable choice; note that if we increase the model size, we can potentially see a decrease in  
91 performance. However, if the number of function calls were to increase significantly, we might require  
92 a larger model. This could occur in scenarios where the target black-box is readily parallelizable.

### 93 **B.3 Further investigations**

94 As we previously noted in the main text, Bayesian optimization forms a vital branch of optimization  
95 research. This is particularly the case for the Gaussian process-based Bayesian optimization, a  
96 practical method employed in machine learning and hyperparameters optimization. Despite its utility,  
97 it is important to note that it comes with an  $\mathcal{O}(N^3)$  complexity, which stands as a significant hurdle. A  
98 proposed potential solution to this issue is a neural-process. [61] This approach is receiving increasing  
99 interest because it offers Gaussian process-like uncertainty estimation while simultaneously reducing  
100 time complexity. However, it still demands the accumulation of search point data for uncertainty  
101 prediction. This requirement results in a continuous escalation in computation time, preventing it  
102 from meeting the  $\mathcal{O}(N)$  complexity when employed in optimization tasks.

103 In the ES domain, numerous modifications have been developed based on well-known and commonly  
104 used algorithms such as GA and CMA-ES [54–56]. In reality, though, optimization experiments  
105 typically deal with around 100 dimensions. Sometimes, these experiments may handle larger  
106 dimensions; in that case however, they usually focus on simpler convex shapes such as the spherical  
107 function and Rosenbrock function; note that Rosenbrock has long flat region around the global  
108 minimum.

109 When it comes to experiments in the 100-1000 dimension range, GSN-based optimization studies  
110 have given promising results. [29]. However, the test functions used in these studies are often special  
111 types of test function rather than common test functions that have been widely used in ES studies,  
112 making it difficult to compare performance. In some cases, Generative Neural Network (GNN) is  
113 used, but not the surrogate model. A GNN-based study [28] has shown optimization results around 10

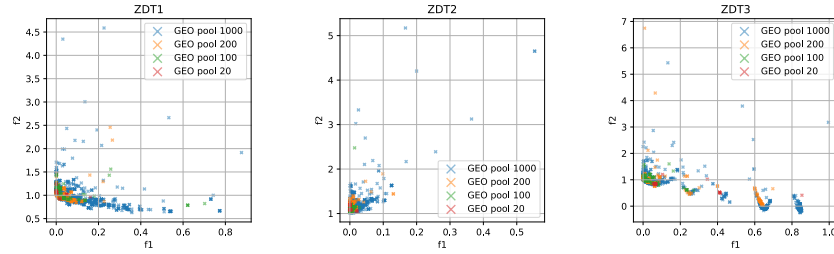

Figure 2: Pool size experiments. Optimization results in 8192 dimension after 100,000 function calls.

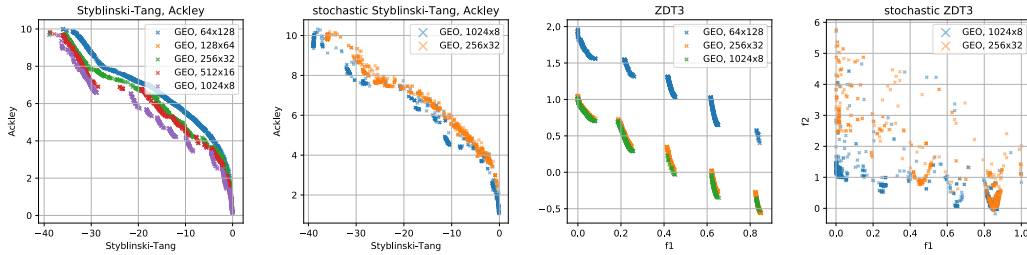

Figure 3: Trunk-branch trick experiments. Optimization results in 8192 dimension after 100,000 function calls. For  $M$  branches,  $8192 = (8192/M) \times M$ .

114 dimensions; however, this is considerably distanced from our target level of dimensions. Therefore,  
 115 we did not take this algorithm into account.

116 Research based on surrogate models is also ongoing. For instance, Pysamoo [57] offers packaged  
 117 optimization algorithms based on surrogate models. Nonetheless, we found that these offered models  
 118 cannot be effectively applied in high dimensions due to time complexity problems. However, as the  
 119 package is regularly updated, it could overcome this problem in the future.

120 Finally, Particle Swarm Optimization (PSO) [5] is a different type of algorithm from ES, but it has  
 121 some similar features. Here, a certain number of elements swarm towards the global optimum while  
 122 preserving their group. Therefore, we can consider how to combine PSO and GSN. However, within  
 123 the scope of this study, we were unable to devise a way to integrate PSO. While ES provides a simple  
 124 means to link GSN’s backpropagation and non-dominated sorting, establishing a similar connection  
 125 in PSO poses a challenge.

## 126 C Additional experiments

### 127 C.1 Pool size

128 The pool size has a direct impact on performance, especially if it is too small. In the experiment, a  
 129 small pool GEO encounters problems when identifying the overall shape of the Pareto-front. This  
 130 problem may arise when the algorithm loses some lines of the Pareto-front in non-dominated sorting,  
 131 making them difficult to recover.

### 132 C.2 Trunk-branch structure

133 In the neural network section, we mentioned that the trunk-branch trick is a temporary solution to  
 134 address the problem of GPU memory shortage. Hence, we also explored the performance related to  
 135 the trunk-branch strategy.

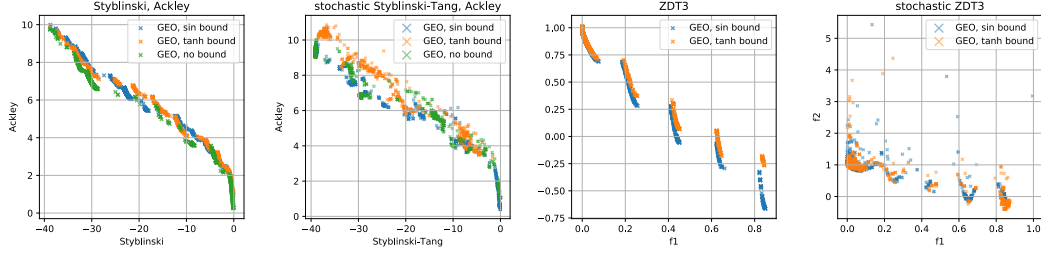

Figure 4: Boundary function experiments. Optimization results in 8192 dimension after 100,000 function calls.

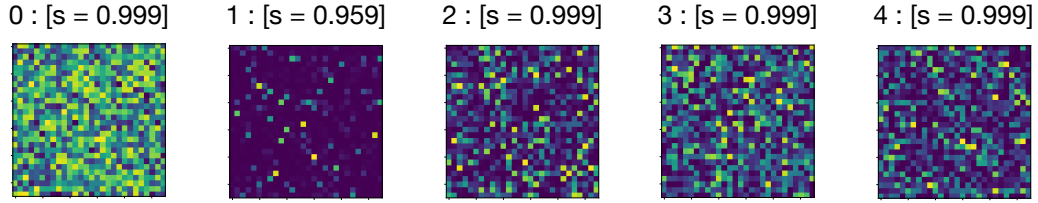

Figure 5: An experiment to black-box optimization of LeNet-5 trained with MNIST. Maximum score  $s = 1.0$ . Although optimization is successful, it do not produce the intended smooth handwriting image.

136 The experimental result clearly shows that as the number of branches increases, the performance  
 137 decreases. The trunk-branch structure enhances the time and space efficiency of the attention network  
 138 but at the expense of optimization performance. Therefore, these results suggest that there are limits  
 139 to increasing the number of branches in extremely high dimensions. It might imply the necessity for  
 140 fundamental changes, such as adopting CNNs.

### 141 C.3 Boundary conditions

142 ZDT test functions require boundary conditions in the search space  $X$ . To implement these boundary  
 143 conditions, we attached an additional function at the end of the generator to enforce boundaries.

$$x = (bound_{max} - bound_{min}) \frac{B(G(z)) + 1}{2} + bound_{min}$$

144 Boundaries could be implemented with functions such as  $B = \tanh$  and  $B = \sin$ , with the periodic  
 145 boundary condition of the  $\sin$  function showing slightly better results. This might occur due to the  
 146 use of the  $\tanh$  function, which could create a bias at the edges, leading to a concentration of points  
 147 that exceed the boundary at the edge. This, in turn, generates redundant data during the training of  
 148 the critic network. Hence, if a boundary is necessary, it is recommended to use a periodic boundary  
 149 condition.

### 150 C.4 Manifold issue

151 In the L-GSO research, it was suggested that the surrogate could effectively discern manifold  
 152 structures, and that optimization performance would likely improve within manifold structures than  
 153 without a manifold structure. As GEO employs a similar surrogate neural network-based algorithm,  
 154 the same circumstances may arise.

155 To visually verify this, we conducted an image generation experiment. We considered a simple  
156 LeNet-5 [44], trained on the MNIST dataset, as a black-box and optimized it. If GEO prefers manifold  
157 structures, images created through black-box optimization should exhibit a smooth shape (likely  
158 resembling actual human hand-drawn images).

159 However, the results are contrary. Even though the optimization is successful, a smooth shape does  
160 not emerge; instead, it produces a noise image resembling an adversarial attack. This casts doubt  
161 on previous research findings suggesting that GSN-based optimization is better suited for learning  
162 manifold structures.

Table 1: Optimization results of Ackley function in low dimensions. 20,000 function calls. 10 repeats.

| Dimension          | Ackley              |                     |                     |                     |
|--------------------|---------------------|---------------------|---------------------|---------------------|
|                    | 2                   | 4                   | 8                   | 16                  |
| GEO                | 0.0000 $\pm$ 0.0000 | 0.0071 $\pm$ 0.0076 | 0.1009 $\pm$ 0.0432 | 0.3014 $\pm$ 0.2451 |
| GEO 1-layer        | 0.0000 $\pm$ 0.0000 | 0.0030 $\pm$ 0.0023 | 0.8575 $\pm$ 0.7513 | 1.9020 $\pm$ 0.2054 |
| GA                 | 0.0001 $\pm$ 0.0002 | 0.0016 $\pm$ 0.0008 | 0.0073 $\pm$ 0.0033 | 0.0411 $\pm$ 0.0066 |
| CMAES              | 0.0000 $\pm$ 0.0000 | 0.0000 $\pm$ 0.0000 | 0.0000 $\pm$ 0.0000 | 0.0000 $\pm$ 0.0000 |
| LSM $\epsilon$ 1.0 | 0.0053 $\pm$ 0.0081 | 0.0261 $\pm$ 0.0118 | 0.1056 $\pm$ 0.0292 | 0.2036 $\pm$ 0.1139 |
| LSM $\epsilon$ 0.2 | 0.0006 $\pm$ 0.0003 | 0.6754 $\pm$ 1.3312 | 0.0354 $\pm$ 0.0076 | 0.8967 $\pm$ 0.9222 |
|                    | 32                  | 64                  | 128                 |                     |
| GEO                | 0.0694 $\pm$ 0.0576 | 0.0361 $\pm$ 0.0185 | 0.0296 $\pm$ 0.0136 |                     |
| GEO 1-layer        | 2.7931 $\pm$ 0.1655 | 3.4449 $\pm$ 0.1133 | 3.8488 $\pm$ 0.1002 |                     |
| GA                 | 0.1132 $\pm$ 0.0163 | 0.2795 $\pm$ 0.0304 | 0.5510 $\pm$ 0.0369 |                     |
| CMAES              | 0.0000 $\pm$ 0.0000 | 0.0000 $\pm$ 0.0000 | 0.0001 $\pm$ 0.0000 |                     |
| LSM $\epsilon$ 1.0 | 0.2430 $\pm$ 0.1160 | 0.3432 $\pm$ 0.1225 | 0.8251 $\pm$ 0.2573 |                     |
| LSM $\epsilon$ 0.2 | 2.5080 $\pm$ 1.2227 | 3.4657 $\pm$ 0.3694 | 3.3817 $\pm$ 0.3004 |                     |

Table 2: Optimization results of Rosenbrock function in low dimensions. 20,000 function calls. 10 repeats.

| Dimension          | Rosenbrock           |                       |                       |                     |
|--------------------|----------------------|-----------------------|-----------------------|---------------------|
|                    | 2                    | 4                     | 8                     | 16                  |
| GEO                | 0.0000 $\pm$ 0.0000  | 0.0543 $\pm$ 0.1507   | 0.5090 $\pm$ 0.4545   | 0.5378 $\pm$ 0.5966 |
| GEO 1-layer        | 0.0000 $\pm$ 0.0000  | 0.3062 $\pm$ 0.2330   | 0.8592 $\pm$ 0.2276   | 3.2036 $\pm$ 1.7442 |
| GA                 | 0.0001 $\pm$ 0.0001  | 0.0888 $\pm$ 0.0488   | 0.5197 $\pm$ 0.1102   | 0.8267 $\pm$ 0.0755 |
| CMAES              | 0.0000 $\pm$ 0.0000  | 0.0000 $\pm$ 0.0000   | 0.0000 $\pm$ 0.0000   | 0.0000 $\pm$ 0.0000 |
| LSM $\epsilon$ 1.0 | 0.3805 $\pm$ 0.3780  | 0.8514 $\pm$ 0.3439   | 1.3913 $\pm$ 0.1683   | 1.7246 $\pm$ 0.1924 |
| LSM $\epsilon$ 0.2 | 0.5814 $\pm$ 0.3466  | 0.5992 $\pm$ 0.3083   | 0.6444 $\pm$ 0.3757   | 0.7882 $\pm$ 0.2399 |
|                    | 32                   | 64                    | 128                   |                     |
| GEO                | 0.1705 $\pm$ 0.2817  | 0.0564 $\pm$ 0.0975   | 0.0164 $\pm$ 0.0170   |                     |
| GEO 1-layer        | 11.3029 $\pm$ 1.3108 | 32.3401 $\pm$ 3.7944  | 61.4009 $\pm$ 4.9140  |                     |
| GA                 | 1.7519 $\pm$ 0.5589  | 4.0404 $\pm$ 0.4313   | 5.9195 $\pm$ 0.2543   |                     |
| CMAES              | 0.6532 $\pm$ 0.0278  | 0.9068 $\pm$ 0.0150   | 0.9734 $\pm$ 0.0102   |                     |
| LSM $\epsilon$ 1.0 | 1.8820 $\pm$ 0.5490  | 2.1025 $\pm$ 0.7888   | 2.0884 $\pm$ 0.7405   |                     |
| LSM $\epsilon$ 0.2 | 1.5623 $\pm$ 0.7663  | 17.4755 $\pm$ 25.1455 | 38.9798 $\pm$ 23.4691 |                     |

Table 3: Optimization results of Rastrigin function in low dimensions. 20,000 function calls. 10 repeats.

| Dimension          | Rastrigin           |                     |                     |                     |
|--------------------|---------------------|---------------------|---------------------|---------------------|
|                    | 2                   | 4                   | 8                   | 16                  |
| GEO                | 0.0000 $\pm$ 0.0000 | 0.1027 $\pm$ 0.1635 | 0.1434 $\pm$ 0.2483 | 0.8459 $\pm$ 0.6891 |
| GEO 1-layer        | 0.0000 $\pm$ 0.0000 | 0.3483 $\pm$ 0.1219 | 0.4758 $\pm$ 0.2170 | 1.2868 $\pm$ 0.3246 |
| GA                 | 0.0000 $\pm$ 0.0000 | 0.0000 $\pm$ 0.0000 | 0.0010 $\pm$ 0.0009 | 0.0127 $\pm$ 0.0048 |
| CMAES              | 0.2985 $\pm$ 0.3300 | 0.4477 $\pm$ 0.2168 | 0.5721 $\pm$ 0.2021 | 0.4166 $\pm$ 0.1446 |
| LSM $\epsilon$ 1.0 | 0.5375 $\pm$ 0.4406 | 3.6183 $\pm$ 1.9796 | 5.6259 $\pm$ 1.2943 | 5.5754 $\pm$ 1.3568 |
| LSM $\epsilon$ 0.2 | 0.0000 $\pm$ 0.0000 | 0.5076 $\pm$ 0.4908 | 0.3248 $\pm$ 0.3222 | 0.4995 $\pm$ 0.2248 |
|                    | 32                  | 64                  | 128                 |                     |
| GEO                | 1.8010 $\pm$ 1.2062 | 1.9690 $\pm$ 1.3727 | 0.8947 $\pm$ 1.1321 |                     |
| GEO 1-layer        | 2.8961 $\pm$ 0.3151 | 4.9785 $\pm$ 0.2506 | 6.4839 $\pm$ 0.2165 |                     |
| GA                 | 0.1580 $\pm$ 0.0452 | 0.5013 $\pm$ 0.0478 | 0.9218 $\pm$ 0.0550 |                     |
| CMAES              | 0.5006 $\pm$ 0.1526 | 0.5208 $\pm$ 0.0961 | 0.6630 $\pm$ 0.0978 |                     |
| LSM $\epsilon$ 1.0 | 5.1430 $\pm$ 1.5115 | 7.8261 $\pm$ 0.8673 | 8.8664 $\pm$ 0.6537 |                     |
| LSM $\epsilon$ 0.2 | 0.6955 $\pm$ 0.3504 | 4.9844 $\pm$ 2.2791 | 7.5184 $\pm$ 1.6464 |                     |

Table 4: Optimization results of Styblinski function in low dimensions. 20,000 function calls. 10 repeats.

| Dimension          | Styblinski-Tang      |                      |                      |                      |
|--------------------|----------------------|----------------------|----------------------|----------------------|
|                    | 2                    | 4                    | 8                    | 16                   |
| GEO                | 0.0000 $\pm$ 0.0000  | 0.0009 $\pm$ 0.0014  | 0.0023 $\pm$ 0.0017  | 0.0161 $\pm$ 0.0176  |
| GEO 1-layer        | 2.1695 $\pm$ 3.2087  | 8.5127 $\pm$ 2.2338  | 15.9916 $\pm$ 1.1828 | 22.4661 $\pm$ 0.5406 |
| GA                 | 0.7068 $\pm$ 2.1205  | 0.7069 $\pm$ 1.4137  | 3.5346 $\pm$ 2.3707  | 5.2253 $\pm$ 0.9198  |
| CMAES              | 7.0684 $\pm$ 5.4751  | 12.7231 $\pm$ 3.2391 | 10.9560 $\pm$ 2.5971 | 9.7190 $\pm$ 2.3708  |
| LSM $\epsilon$ 1.0 | 26.2230 $\pm$ 1.9996 | 7.6978 $\pm$ 1.2559  | 6.4853 $\pm$ 3.9141  | 9.5768 $\pm$ 4.0347  |
| LSM $\epsilon$ 0.2 | 27.6515 $\pm$ 2.8802 | 16.1667 $\pm$ 1.6806 | 12.1698 $\pm$ 2.0510 | 19.3622 $\pm$ 3.1020 |
|                    | 32                   | 64                   | 128                  |                      |
| GEO                | 0.0064 $\pm$ 0.0092  | 1.4138 $\pm$ 4.2410  | 0.0000 $\pm$ 0.0000  |                      |
| GEO 1-layer        | 25.3427 $\pm$ 0.5938 | 27.5193 $\pm$ 0.6898 | 29.3574 $\pm$ 0.3288 |                      |
| GA                 | 7.9346 $\pm$ 1.0712  | 11.2910 $\pm$ 0.5126 | 18.3960 $\pm$ 0.3724 |                      |
| CMAES              | 8.4820 $\pm$ 2.2159  | 9.9841 $\pm$ 0.6612  | 9.2883 $\pm$ 0.5663  |                      |
| LSM $\epsilon$ 1.0 | 9.7605 $\pm$ 4.3111  | 8.7600 $\pm$ 2.9911  | 17.5349 $\pm$ 4.3426 |                      |
| LSM $\epsilon$ 0.2 | 18.9152 $\pm$ 2.6356 | 32.2802 $\pm$ 2.4185 | 33.5116 $\pm$ 2.6515 |                      |



Table 5: Optimization results of test functions in high dimensions. 50,000 function calls. 10 repeats

| Ackley          |                      |                      |                      |
|-----------------|----------------------|----------------------|----------------------|
| Dimension       | 256                  | 512                  | 1024                 |
| GEO             | $0.0091 \pm 0.0036$  | $0.0117 \pm 0.0037$  | $0.0084 \pm 0.0029$  |
| GA              | $0.3294 \pm 0.0219$  | $0.7342 \pm 0.0273$  | $1.4256 \pm 0.0477$  |
| CMAES           | $0.0000 \pm 0.0000$  | $0.0003 \pm 0.0000$  | $0.0291 \pm 0.0035$  |
| Rosenbrock      |                      |                      |                      |
| Dimension       | 256                  | 512                  | 1024                 |
| GEO             | $0.0006 \pm 0.0006$  | $0.0004 \pm 0.0003$  | $0.0005 \pm 0.0004$  |
| GA              | $5.0726 \pm 0.2486$  | $5.9915 \pm 0.2358$  | $6.9435 \pm 0.1485$  |
| CMAES           | $0.9742 \pm 0.0062$  | $1.0011 \pm 0.0337$  | $1.0292 \pm 0.0301$  |
| Rastrigin       |                      |                      |                      |
| Dimension       | 256                  | 512                  | 1024                 |
| GEO             | $0.2034 \pm 0.4046$  | $0.0018 \pm 0.0020$  | $0.0034 \pm 0.0057$  |
| GA              | $0.5636 \pm 0.0317$  | $0.9810 \pm 0.3457$  | $1.7443 \pm 0.0638$  |
| CMAES           | $0.9573 \pm 0.1040$  | $1.3981 \pm 0.1383$  | $3.7305 \pm 0.6978$  |
| Styblinski-Tang |                      |                      |                      |
| Dimension       | 256                  | 512                  | 1024                 |
| GEO             | $0.0000 \pm 0.0000$  | $0.0000 \pm 0.0000$  | $0.0000 \pm 0.0000$  |
| GA              | $14.4536 \pm 0.3616$ | $22.3592 \pm 0.2035$ | $28.8298 \pm 0.1541$ |
| CMAES           | $9.6913 \pm 0.4508$  | $9.3711 \pm 0.1878$  | $9.2048 \pm 0.2450$  |

## References

- [1] Snoek, J., Larochelle, H., & Adams, R. P. (2012). Practical bayesian optimization of machine learning algorithms. *Advances in neural information processing systems*, 25.
- [2] Frazier, P. I. (2018). A tutorial on Bayesian optimization. *arXiv preprint arXiv:1807.02811*.
- [3] Lan, G., Tomczak, J. M., Roijers, D. M., & Eiben, A. E. (2022). Time efficiency in optimization with a bayesian-evolutionary algorithm. *Swarm and Evolutionary Computation*, 69, 100970.
- [4] Nelder, J. A., & Mead, R. (1965). A simplex method for function minimization. *The computer journal*, 7(4), 308-313.
- [5] Kennedy, J., & Eberhart, R. (1995, November). Particle swarm optimization. In *Proceedings of ICNN'95-international conference on neural networks* (Vol. 4, pp. 1942-1948). IEEE.
- [6] Hooke, R., & Jeeves, T. A. (1961). "Direct Search" Solution of Numerical and Statistical Problems. *Journal of the ACM (JACM)*, 8(2), 212-229.
- [7] Deb, K., Pratap, A., Agarwal, S., & Meyarivan, T. A. M. T. (2002). A fast and elitist multiobjective genetic algorithm: NSGA-II. *IEEE transactions on evolutionary computation*, 6(2), 182-197.
- [8] Deb, K., & Sundar, J. (2006, July). Reference point based multi-objective optimization using evolutionary algorithms. In *Proceedings of the 8th annual conference on Genetic and evolutionary computation* (pp. 635-642).
- [9] Hansen, N., & Ostermeier, A. (2001). Completely derandomized self-adaptation in evolution strategies. *Evolutionary computation*, 9(2), 159-195.
- [10] Hansen, N. (2006). The CMA evolution strategy: a comparing review. *Towards a new evolutionary computation*, 75-102.
- [11] Price, K., Storn, R. M., & Lampinen, J. A. (2006). *Differential evolution: a practical approach to global optimization*. Springer Science & Business Media.
- [12] Runarsson, T. P., & Yao, X. (2000). Stochastic ranking for constrained evolutionary optimization. *IEEE Transactions on evolutionary computation*, 4(3), 284-294.
- [13] Runarsson, T. P., & Yao, X. (2005). Search biases in constrained evolutionary optimization. *IEEE Transactions on Systems, Man, and Cybernetics, Part C (Applications and Reviews)*, 35(2), 233-243.
- [14] Deb, K., & Jain, H. (2013). An evolutionary many-objective optimization algorithm using reference-point-based nondominated sorting approach, part I: solving problems with box constraints. *IEEE transactions on evolutionary computation*, 18(4), 577-601.
- [15] Blank, J., Deb, K., & Roy, P. C. (2019, March). Investigating the normalization procedure of NSGA-III. In *International Conference on Evolutionary Multi-Criterion Optimization* (pp. 229-240). Springer, Cham.
- [16] Seada, H., & Deb, K. (2015). A unified evolutionary optimization procedure for single, multiple, and many objectives. *IEEE Transactions on Evolutionary Computation*, 20(3), 358-369.
- [17] Vesikar, Y., Deb, K., & Blank, J. (2018, November). Reference point based NSGA-III for preferred solutions. In *2018 IEEE symposium series on computational intelligence (SSCI)* (pp. 1587-1594). IEEE.
- [18] Carvalho, R. D., Saldanha, R. R., Gomes, B. N., Lisboa, A. C., & Martins, A. X. (2012). A multi-objective evolutionary algorithm based on decomposition for optimal design of Yagi-Uda antennas. *IEEE Transactions on Magnetics*, 48(2), 803-806.
- [19] Li, K., Chen, R., Fu, G., & Yao, X. (2018). Two-archive evolutionary algorithm for constrained multiobjective optimization. *IEEE Transactions on Evolutionary Computation*, 23(2), 303-315.
- [20] Panichella, A. (2019, July). An adaptive evolutionary algorithm based on non-Euclidean geometry for many-objective optimization. In *Proceedings of the Genetic and Evolutionary Computation Conference* (pp. 595-603).
- [21] Shirobokov, S., Belavin, V., Kagan, M., Ustyuzhanin, A., & Baydin, A. G. (2020). Black-box optimization with local generative surrogates. *Advances in Neural Information Processing Systems*, 33, 14650-14662.
- [22] Wang, C., Xu, C., Yao, X., & Tao, D. (2019). Evolutionary generative adversarial networks. *IEEE Transactions on Evolutionary Computation*, 23(6), 921-934.
- [23] Jiang, J., & Fan, J. A. (2019). Global optimization of dielectric metasurfaces using a physics-driven neural network. *Nano letters*, 19(8), 5366-5372.
- [24] Yang, J., Sell, D., & Fan, J. A. (2018). Freeform metagratings based on complex light scattering dynamics for extreme, high efficiency beam steering. *Annalen der Physik*, 530(1), 1700302.
- [25] Hughes, T. W., Minkov, M., Williamson, I. A., & Fan, S. (2018). Adjoint method and inverse design for nonlinear nanophotonic devices. *ACS Photonics*, 5(12), 4781-4787.

- [26] Jensen, J. S., & Sigmund, O. (2011). Topology optimization for nano-photonics. *Laser & Photonics Reviews*, 5(2), 308-321.
- [27] Molesky, S., Lin, Z., Piggott, A. Y., Jin, W., Vucković, J., & Rodriguez, A. W. (2018). Inverse design in nanophotonics. *Nature Photonics*, 12(11), 659-670.
- [28] Fauray, L., Calauzenes, C., Fercq, O., & Krichen, S. (2019). Improving evolutionary strategies with generative neural networks. *arXiv preprint arXiv:1901.11271*.
- [29] Trabucco, B., Kumar, A., Geng, X., & Levine, S. (2021, July). Conservative objective models for effective offline model-based optimization. In *International Conference on Machine Learning* (pp. 10358-10368). PMLR.
- [30] Goodfellow, I., Pouget-Abadie, J., Mirza, M., Xu, B., Warde-Farley, D., Ozair, S., ... & Bengio, Y. (2014). Generative adversarial nets. *Advances in neural information processing systems*, 27.
- [31] Karras, T., Aila, T., Laine, S., & Lehtinen, J. (2017). Progressive growing of gans for improved quality, stability, and variation. *arXiv preprint arXiv:1710.10196*.
- [32] Karras, T., Laine, S., & Aila, T. (2019). A style-based generator architecture for generative adversarial networks. In *Proceedings of the IEEE/CVF conference on computer vision and pattern recognition* (pp. 4401-4410).
- [33] Mnih, V., Kavukcuoglu, K., Silver, D., Graves, A., Antonoglou, I., Wierstra, D., & Riedmiller, M. (2013). Playing atari with deep reinforcement learning. *arXiv preprint arXiv:1312.5602*.
- [34] Mnih, V., Badia, A. P., Mirza, M., Graves, A., Lillicrap, T., Harley, T., ... & Kavukcuoglu, K. (2016, June). Asynchronous methods for deep reinforcement learning. In *International conference on machine learning* (pp. 1928-1937). PMLR.
- [35] Rastrigin, L. A. (1974) Systems of extremal control. Mir, Moscow.
- [36] Hoffmeister, F., & Bäck, T. (1990, October). Genetic algorithms and evolution strategies: Similarities and differences. In *International Conference on Parallel Problem Solving from Nature* (pp. 455-469). Springer, Berlin, Heidelberg.
- [37] Mühlenbein, H., Schomisch, M., & Born, J. (1991). The parallel genetic algorithm as function optimizer. *Parallel computing*, 17(6-7), 619-632.
- [38] Ackley, D. (2012). *A connectionist machine for genetic hillclimbing* (Vol. 28). Springer Science & Business Media.
- [39] Rosenbrock, H. (1960). An automatic method for finding the greatest or least value of a function. *The Computer Journal*, 3(3), 175-184.
- [40] Dixon, L. C. W., & Mills, D. J. (1994). Effect of rounding errors on the variable metric method. *Journal of Optimization Theory and Applications*, 80(1), 175-179.
- [41] Styblinski, M. A., & Tang, T. S. (1990). Experiments in nonconvex optimization: stochastic approximation with function smoothing and simulated annealing. *Neural Networks*, 3(4), 467-483.
- [42] Deb, K., Thiele, L., Laumanns, M., & Zitzler, E. (2002, May). Scalable multi-objective optimization test problems. In *Proceedings of the 2002 Congress on Evolutionary Computation. CEC'02 (Cat. No. 02TH8600)* (Vol. 1, pp. 825-830). IEEE.
- [43] Kumar, S. (2020). Balancing a CartPole System with Reinforcement Learning—A Tutorial. *arXiv preprint arXiv:2006.04938*.
- [44] LeCun, Y., Bottou, L., Bengio, Y., & Haffner, P. (1998). Gradient-based learning applied to document recognition. *Proceedings of the IEEE*, 86(11), 2278-2324.
- [45] LeCun, Y., Boser, B., Denker, J. S., Henderson, D., Howard, R. E., Hubbard, W., & Jackel, L. D. (1989). Backpropagation applied to handwritten zip code recognition. *Neural computation*, 1(4), 541-551.
- [46] Rumelhart, D. E., Hinton, G. E., & Williams, R. J. (1986). Learning representations by back-propagating errors. *nature*, 323(6088), 533-536.
- [47] Hochreiter, S., & Schmidhuber, J. (1997). Long short-term memory. *Neural computation*, 9(8), 1735-1780.
- [48] Cho, K., Van Merriënboer, B., Bahdanau, D., & Bengio, Y. (2014). On the properties of neural machine translation: Encoder-decoder approaches. *arXiv preprint arXiv:1409.1259*.
- [49] Vaswani, A., Shazeer, N., Parmar, N., Uszkoreit, J., Jones, L., Gomez, A. N., ... & Polosukhin, I. (2017). Attention is all you need. *Advances in neural information processing systems*, 30.
- [50] Srivastava, N., Hinton, G., Krizhevsky, A., Sutskever, I., & Salakhutdinov, R. (2014). Dropout: a simple way to prevent neural networks from overfitting. *The journal of machine learning research*, 15(1), 1929-1958.

- 271 [51] Blank, J., & Deb, K. (2020). Pymoo: Multi-objective optimization in python. *IEEE Access*, 8, 89497-  
272 89509.
- 273 [52] Iman, R. L., Davenport, J. M., & Zeigler, D. K. (1980). *Latin hypercube sampling (program user's*  
274 *guide).[LHC, in FORTRAN]* (No. SAND-79-1473). Sandia Labs., Albuquerque, NM (USA).
- 275 [53] Brockman, G., Cheung, V., Pettersson, L., Schneider, J., Schulman, J., Tang, J., & Zaremba, W. (2016).  
276 Openai gym. *arXiv preprint arXiv:1606.01540*.
- 277 [54] Ros, R., & Hansen, N. (2008, September). A simple modification in CMA-ES achieving linear time and  
278 space complexity. *In International conference on parallel problem solving from nature* (pp. 296-305).  
279 Springer, Berlin, Heidelberg.
- 280 [55] Akimoto, Y., Auger, A., & Hansen, N. (2014, July). Comparison-based natural gradient optimization in  
281 high dimension. *In Proceedings of the 2014 Annual Conference on Genetic and Evolutionary Computation*  
282 (pp. 373-380).
- 283 [56] Loshchilov, I. (2017). LM-CMA: An alternative to L-BFGS for large-scale black box optimization.  
284 *Evolutionary computation*, 25(1), 143-171.
- 285 [57] Blank, J., & Deb, K. (2022). pysamoo: Surrogate-Assisted Multi-Objective Optimization in Python. *arXiv*  
286 *preprint arXiv:2204.05855*.
- 287 [58] Tian, Y., Wang, H., Zhang, X., & Jin, Y. (2017). Effectiveness and efficiency of non-dominated sorting for  
288 evolutionary multi-and many-objective optimization. *Complex & Intelligent Systems*, 3(4), 247-263.
- 289 [59] Long, Q., Wu, X., & Wu, C. (2021). Non-dominated sorting methods for multi-objective optimization:  
290 review and numerical comparison. *Journal of Industrial & Management Optimization*, 17(2), 1001.
- 291 [60] Salimans, T., Ho, J., Chen, X., Sidor, S., & Sutskever, I. (2017). Evolution strategies as a scalable  
292 alternative to reinforcement learning. *arXiv preprint arXiv:1703.03864*.
- 293 [61] Garnelo, M., Schwarz, J., Rosenbaum, D., Viola, F., Rezende, D. J., Eslami, S. M., & Teh, Y. W. (2018).  
294 Neural processes. *arXiv preprint arXiv:1807.01622*.
